# Supplementary material
Source: MDPI journal article supplement (https://www.mdpi.com/1999-4907/14/8/1594)
Supplement: s1 [file s1]

## Supplementary Materials:

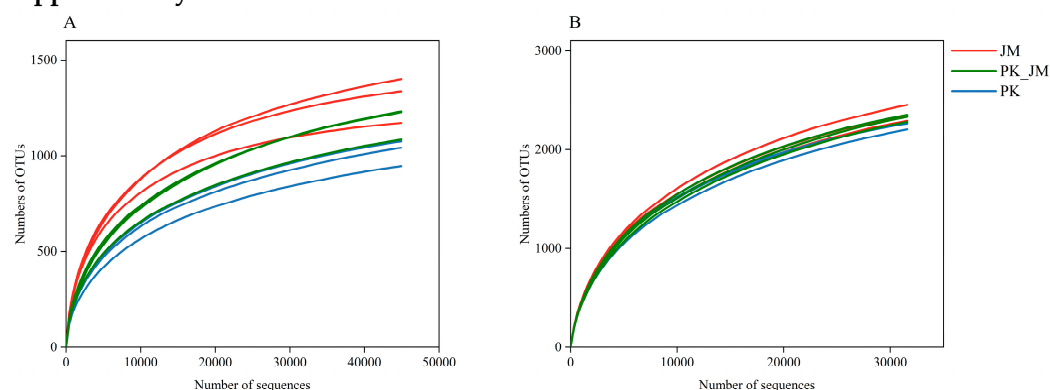

**Figure S1.** The Rarefaction curves of the number of operational taxonomic units (OTUs) for soil fungal (A) and bacterial (B) communities. Random subsamples of 44,925 and 31,586 gene per sample were used to generate the rarefaction curves. OTUs were delineated at 97% sequence similarity. JM for *Juglans mandshurica* plantations, PK\_JM for *Pinus koraiensis* and *J. mandshurica* mixed plantations, PK for *P. koraiensis* plantations.

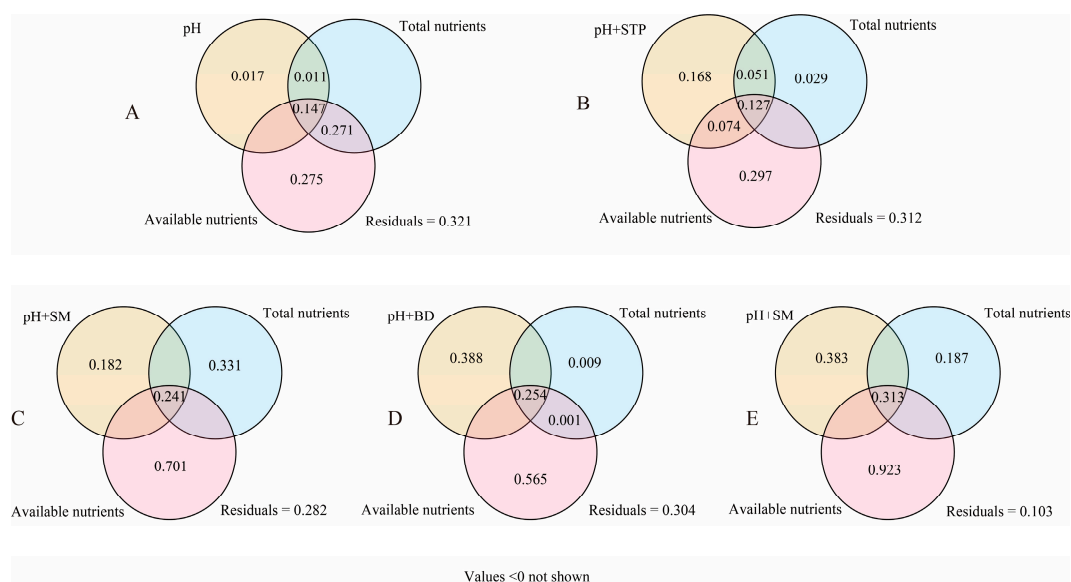

**Figure S2.** Venn diagram of variation partition analysis (VPA) showed the contributions of different types of soil variables to the variations in fungal Genus-level taxonomy (A) and function category based on FUNGuild database (B), bacterial Genus-level taxonomy (C) and function category based on FAPROTAX (D) and Bugbase databases (E). The soil variables in each subgraph were first screened by the results of tbrDA (Figure 6) and then classified by total nutrient content, available nutrient content, and soil pH with or without soil physical property.

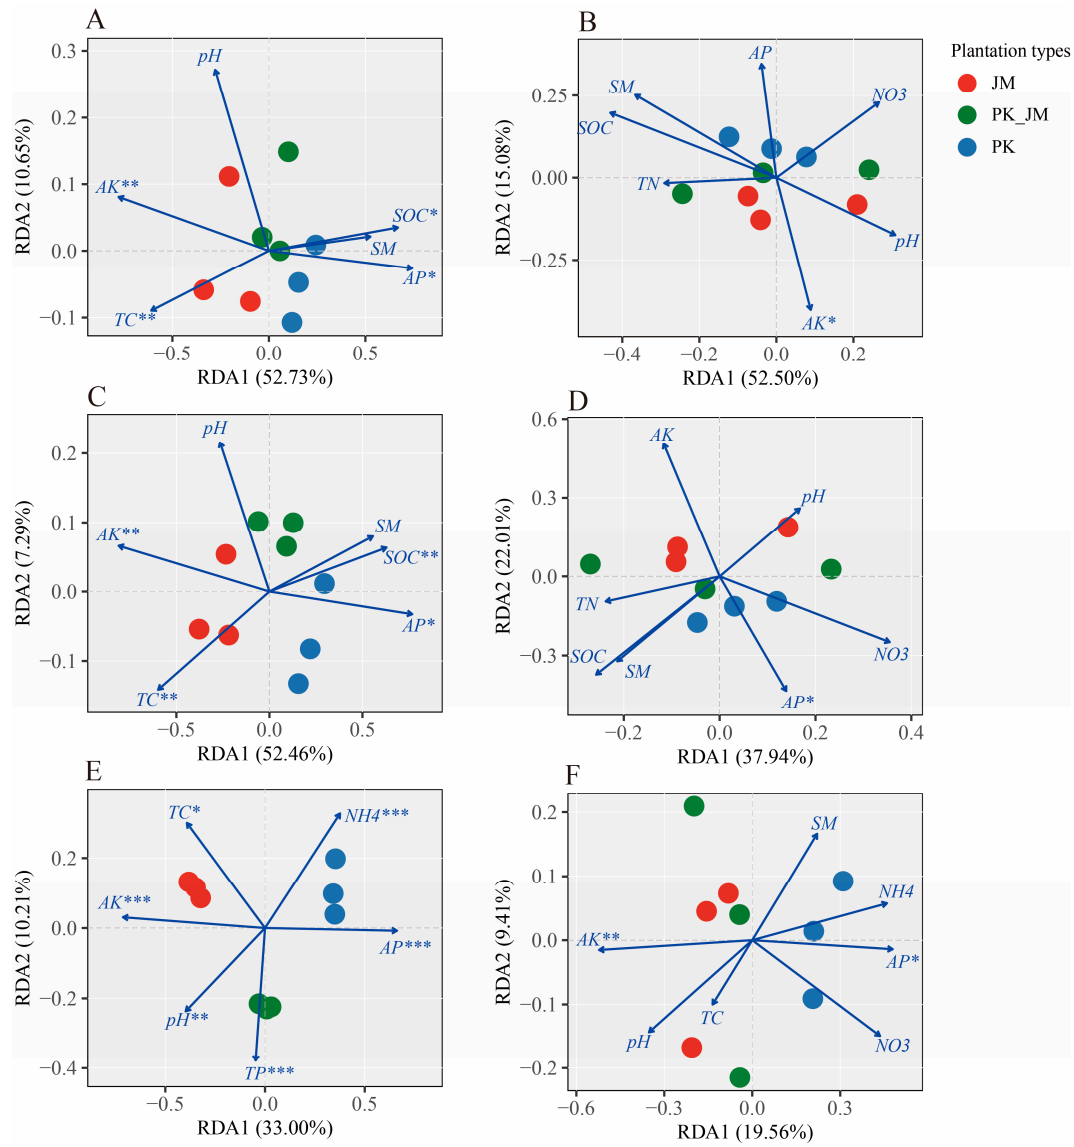

**Figure S3.** The results of Redundancy analysis (RDA) showed the correlation between the soil physicochemical parameters and microbial community composition in different taxonomy levels: fungal phylum (A), class (C), and OTU (E) levels, and bacterial phylum (B), class (D), and OTU (F) levels. JM for *Juglans mandshurica* plantations, PK\_JM for *Pinus koraiensis* and *J. mandshurica* mixed plantations, PK for *P. koraiensis* plantations.

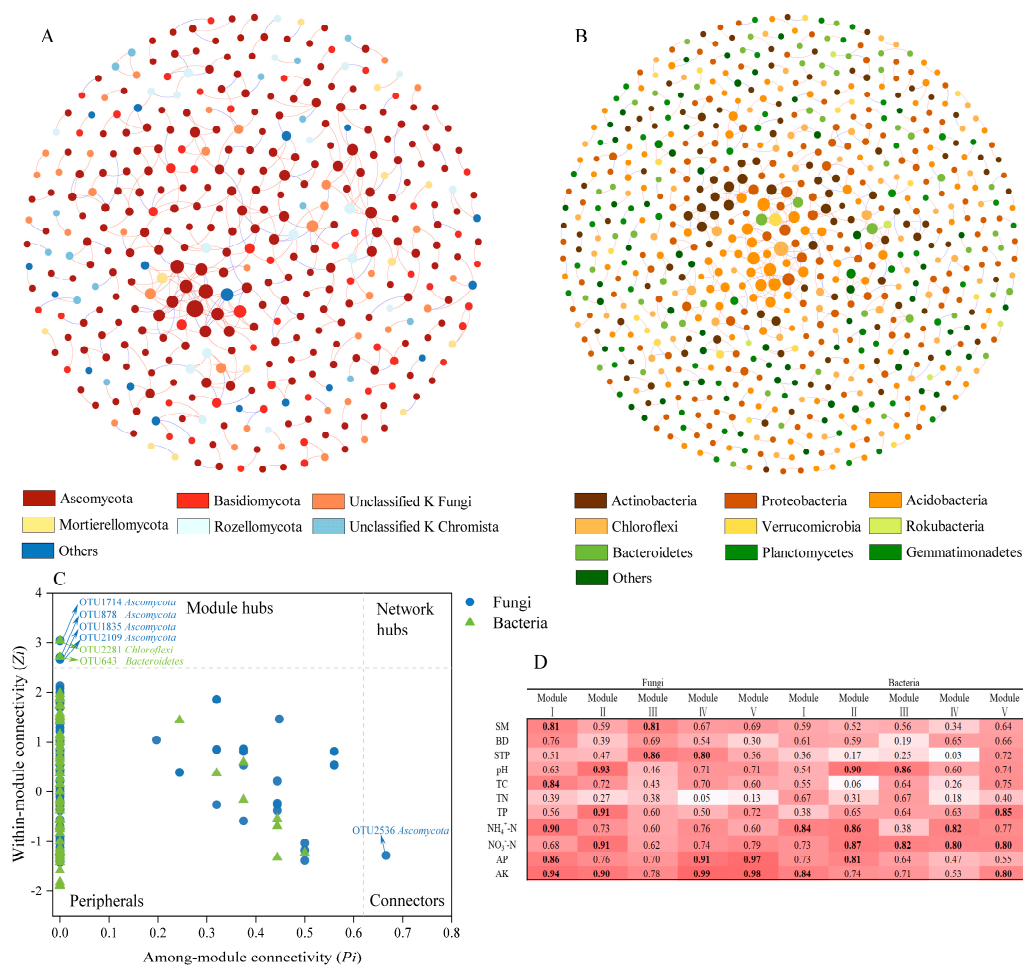

**Figure S4.** The patterns of soil fungal (A) and bacterial (B) co-occurrence networks. Each node represented one type of OTUs and was colored by phylum taxonomic categories. Positive links between nodes were shown in red, and negative links were in blue. The size of each node was proportional to the number of degrees. Topological role of each node (OTU) in the soil fungal and bacterial co-occurrence networks was indicated by the Zi-Pi plot (C). The network hubs are determined by  $Z_i > 2.5$  and  $P_i > 0.62$ , and the peripherals are characterized by  $Z_i < 2.5$  and  $P_i < 0.62$ . The nodes with  $Z_i > 2.5$  are identified as module hubs, and those with  $P_i > 0.62$  are connectors. We also showed the Spearman's correlations between soil variables and the sub-networks in fungal and bacterial communities (D). Significant correlation coefficients ( $P < 0.05$ ) were shown in bold. BD, Bulk density; SM, Soil moisture; STP, Soil total porosity; TC, Total carbon; TN, Total nitrogen; TP, Total phosphorus;  $\text{NH}_4^+\text{-N}$ , Ammonium nitrogen;  $\text{NO}_3^-\text{-N}$ , Nitrate nitrogen; AP, Available phosphorus; AK, Available potassium.

**Table S1.** The basic situation of the three forest types.

| Stand | Species               | Existing density<br>(No.·ha <sup>-1</sup> ) | Average tree height (m) | Mean breast diameter (cm) | Mean individual volume (m <sup>3</sup> ) | Stand volume (m <sup>3</sup> ·ha <sup>-1</sup> ) |
|-------|-----------------------|---------------------------------------------|-------------------------|---------------------------|------------------------------------------|--------------------------------------------------|
| JM    | <i>J. mandshurica</i> | 800                                         | 13.1                    | 14.8                      | 0.116                                    | 88.25                                            |
| PK_JM | <i>J. mandshurica</i> | 578                                         | 13.2                    | 19.1                      | 0.187                                    | 90.95                                            |
|       | <i>P. koraiensis</i>  | 522                                         | 8.5                     | 10.9                      | 0.051                                    | 25.17                                            |
| PK    | <i>P. koraiensis</i>  | 750                                         | 11.4                    | 13.6                      | 0.092                                    | 64.05                                            |

JM for *Juglans mandshurica* plantations, PK\_JM for *Pinus koraiensis* and *J. mandshurica* mixed plantations, PK for *P. koraiensis* plantations. The stand volum of PK\_JM is the accumulation of Manchurian walnut and Korean pine in the mixed plantation.

**Table S2.** The effects of plantation types on the relative abundance of soil fungal phyla and classes.

| Taxonomy | The relative abundance (%) | GLMM |
|----------|----------------------------|------|
|----------|----------------------------|------|

|         |                                    | JM           | PK_JM        | PK           | F      | P       |
|---------|------------------------------------|--------------|--------------|--------------|--------|---------|
| Phyla   | Ascomycota                         | 64.03±3.71 b | 77.00±1.95 a | 76.33±1.28 a | 8.338  | 0.019*  |
|         | Basidiomycota                      | 5.77±0.50 b  | 6.59±0.23 b  | 9.69±0.28 a  | 34.301 | 0.001** |
|         | Unclassified K Fungi               | 8.64±1.59 a  | 5.05±0.50 a  | 4.67±1.42 a  | 3.001  | 0.125   |
|         | Mortierellomycota                  | 6.39±1.18 a  | 3.55±1.37 a  | 4.72±0.40 a  | 1.780  | 0.247   |
|         | Rozellomycota                      | 7.65±1.70 b  | 4.27±1.20 ab | 1.41±0.39 a  | 6.554  | 0.031*  |
|         | Unclassified K Chromista           | 6.60±1.55 a  | 2.66±0.38 b  | 2.14±0.63 b  | 6.079  | 0.036*  |
| Classes | Leotiomycetes                      | 23.24±2.58 b | 37.42±4.49 a | 45.24±1.18 a | 13.214 | 0.006** |
|         | Sordariomycetes                    | 24.27±1.61 a | 16.42±1.90 b | 10.98±0.33 c | 21.226 | 0.002** |
|         | Unclassified k Fungi               | 8.65±1.57 a  | 5.06±0.50 a  | 4.67±1.44 a  | 3.020  | 0.124   |
|         | Unclassified p Ascomycota          | 2.41±0.42 b  | 7.82±1.43 a  | 6.95±0.89 a  | 8.419  | 0.018*  |
|         | Dothideomycetes                    | 5.41±0.22 ab | 6.99±1.11 a  | 3.87±0.54 b  | 4.681  | 0.060   |
|         | Mortierellomycetes                 | 6.45±1.22 a  | 3.56±1.35 a  | 4.71±0.40 a  | 1.837  | 0.239   |
|         | Eurotiomycetes                     | 3.52±0.23 a  | 3.78±0.25 a  | 5.41±0.75 a  | 4.599  | 0.062   |
|         | Rozellomycotina cls Incertae sedis | 7.32±1.65 a  | 3.79±1.13 ab | 1.34±0.39 b  | 6.543  | 0.031*  |
|         | Unclassified k Chromista           | 6.58±1.56 a  | 2.67±0.39 b  | 2.14±0.64 b  | 5.885  | 0.038*  |
|         | Pezizomycetes                      | 4.69±0.07 a  | 3.98±0.19 a  | 2.32±0.41 b  | 21.397 | 0.002** |
|         | Agaricomycetes                     | 3.83±0.41 a  | 2.41±0.06 a  | 3.50±0.83 a  | 1.922  | 0.226   |
|         | Tremellomycetes                    | 1.42±0.24 b  | 3.15±0.26 ab | 4.68±1.11 a  | 5.864  | 0.039*  |

Mean ± Standard Error. Different lowercase letters in the same row indicate significant differences ( $P < 0.05$ ) amongst the three plantation types based on the results of the generalized linear mixed model (GLMM) with Tukey's multiple comparisons. \*,  $P < 0.05$ ; \*\*,  $P < 0.01$ ; \*\*\*  $P < 0.001$ . JM for *Juglans mandshurica* plantations, PK\_JM for *Pinus koraiensis* and *J. mandshurica* mixed plantations, PK for *P. koraiensis* plantations.

**Table S3.** The effects of plantation types on the relative abundance of soil bacterial phyla and classes.

| Taxonomy |                           | Plantation types |              |              | GLMM   |         |
|----------|---------------------------|------------------|--------------|--------------|--------|---------|
|          |                           | JM               | PK_JM        | PK           | F      | P       |
| Phyla    | Actinobacteria            | 32.75±1.52 a     | 29.23±2.06 a | 25.20±1.97 a | 4.105  | 0.075   |
|          | Proteobacteria            | 29.40±2.12 a     | 31.52±4.07 a | 33.90±0.87 a | 0.695  | 0.535   |
|          | Acidobacteria             | 12.52±1.57 a     | 13.04±2.82 a | 13.62±1.35 a | 0.074  | 0.929   |
|          | Chloroflexi               | 7.95±0.76 a      | 7.74±1.73 a  | 7.42±0.42 a  | 0.056  | 0.946   |
|          | Verrucomicrobia           | 5.61±1.39 a      | 7.51±1.84 a  | 7.04±1.05 a  | 0.455  | 0.655   |
|          | Rokubacteria              | 4.11±0.23 a      | 3.13±0.25 a  | 3.77±0.38 a  | 2.818  | 0.137   |
|          | Bacteroidetes             | 2.82±0.34 a      | 2.72±0.25 a  | 2.89±0.17 a  | 0.098  | 0.908   |
|          | Planctomycetes            | 1.02±0.14 a      | 1.20±0.14 a  | 1.20±0.20 a  | 0.438  | 0.664   |
|          | Gemmatimonadetes          | 1.02±0.15 b      | 0.96±0.14 b  | 1.66±0.11 a  | 8.116  | 0.020*  |
| Classes  | Actinobacteria            | 32.76±1.52 a     | 29.23±2.06 a | 25.20±1.97 a | 4.105  | 0.075   |
|          | Alphaproteobacteria       | 17.07±0.69 a     | 21.05±3.37 a | 23.41±0.96 a | 2.422  | 0.169   |
|          | Subgroup 6                | 6.48±0.88 a      | 6.82±2.22 a  | 5.73±0.65 a  | 0.152  | 0.862   |
|          | Gammaproteobacteria       | 7.49±0.97 a      | 6.41±0.65 a  | 5.60±0.12 a  | 1.964  | 0.221   |
|          | Verrucomicrobiae          | 5.61±1.39 a      | 7.51±1.84 a  | 7.04±1.05 a  | 0.455  | 0.655   |
|          | Deltaproteobacteria       | 4.84±0.47 a      | 4.05±0.40 a  | 4.88±0.25 a  | 1.450  | 0.306   |
|          | KD4-96                    | 3.72±0.63 a      | 3.70±1.14 a  | 2.90±0.29 a  | 0.370  | 0.706   |
|          | NC 10                     | 4.11±0.23 a      | 3.13±0.25 a  | 3.77±0.38 a  | 2.818  | 0.137   |
|          | Bacteroidia               | 2.74±0.32 a      | 2.66±0.25 a  | 2.83±0.17 a  | 0.117  | 0.892   |
|          | Blastocatellia Subgroup 4 | 2.02±0.31 a      | 2.18±0.54 a  | 1.96±0.21 a  | 0.091  | 0.914   |
|          | Acidobacteriia            | 1.44±0.119 b     | 1.68±0.39 b  | 3.46±0.28 a  | 13.700 | 0.006** |
|          | Anaerolineae              | 1.15±0.06 a      | 1.18±0.28 a  | 0.94±0.10 a  | 0.538  | 0.610   |
|          | Subgroup 17               | 0.83±0.11 a      | 0.75±0.26 a  | 0.66±0.12 a  | 0.224  | 0.806   |

Mean ± Standard Error. Different lowercase letters in the same row indicate significant differences ( $P < 0.05$ ) amongst the three plantation types based on the results of the generalized linear mixed model (GLMM) with Tukey's multiple

comparisons. \*,  $P < 0.05$ ; \*\*,  $P < 0.01$ ; \*\*\*  $P < 0.001$ . JM for *Juglans mandshurica* plantations, PK\_JM for *Pinus koraiensis* and *J. mandshurica* mixed plantations, PK for *P. koraiensis* plantations.

**Table S4.** The changes of soil fungal functional guilds composition in different plantation types.

| FUNGuilds   |                      | JM (%)        | PK_JM (%)    | PK (%)       |
|-------------|----------------------|---------------|--------------|--------------|
| Pathotroph  | Animal Pathogen      | 23.41±1.56 ab | 27.68±3.03 a | 17.64±0.92 b |
|             | Plant Pathogen       | 6.57±0.92 a   | 5.57±0.96 a  | 4.40±0.83 a  |
|             | Fungal Parasite      | 1.05±0.11 b   | 2.73±0.21 ab | 4.35±1.08 a  |
|             |                      | 31.03±2.22 ab | 35.98±1.87 a | 26.39±1.56 b |
| Saprotroph  | Undefined Saprotroph | 21.49±1.12 a  | 19.69±0.91 a | 22.66±0.20 a |
|             | Plant Saprotroph     | 1.49±0.30 b   | 0.89±0.18 b  | 2.64±0.40 a  |
|             | Dung Saprotroph      | 0.82±0.11 a   | 0.65±0.09 a  | 0.84±0.21 a  |
|             | Leaf Saprotroph      | 0.34±0.05 a   | 0.21±0.04 b  | 0.15±0.02 b  |
|             | Wood Saprotroph      | 0.29±0.07 a   | 0.12±0.02 b  | 0.10±0.01 b  |
|             | Soil Saprotroph      | 0.11±0.01 a   | 0.02±0.00 b  | 0.01±0.00 b  |
|             | Litter Saprotroph    | 0.10±0.04 a   | 0.03±0.01 ab | 0.01±0.00 b  |
|             |                      | 24.65±1.30 ab | 21.61±0.85 b | 26.40±0.08 a |
| Symbiotroph | Ectomycorrhizal      | 1.09±0.10 a   | 0.93±0.14 a  | 2.43±0.83 a  |
|             | Endophyte            | 8.06±1.14 a   | 5.30±1.23 a  | 6.50±0.69 a  |
|             | Ericoid Mycorrhizal  | 0.10±0.03 c   | 0.53±0.06 b  | 1.24±0.01 a  |
|             |                      | 9.26±1.11 a   | 6.76±1.12 a  | 10.16±1.51 a |
| Others      |                      | 0.12±0.03 b   | 0.09±0.04 b  | 0.45±0.14 a  |
| Undefined   |                      | 34.58±3.46 a  | 35.05±1.69 a | 37.47±0.71 a |

Mean ± Standard Error. Different lowercase letters in the same row indicate significant differences ( $P < 0.05$ ) amongst the three plantation types based on the results of the generalized linear mixed model (GLMM) with Tukey's multiple comparisons. JM for *Juglans mandshurica* plantations, PK\_JM for *Pinus koraiensis* and *J. mandshurica* mixed plantations, PK for *P. koraiensis* plantations.

**Table S5.** Mantel test results for the correlation between soil microbial community with functional groups and soil variables.

| Soil Variables                  | Fungalgenus taxonomy |           | Fungalfunction froups |         | Bacterialgenus taxonomy |         | Bacterialecological froups |         | Bacterialphenotypes froups |         |
|---------------------------------|----------------------|-----------|-----------------------|---------|-------------------------|---------|----------------------------|---------|----------------------------|---------|
|                                 | R <sup>2</sup>       | P         | R <sup>2</sup>        | P       | R <sup>2</sup>          | P       | R <sup>2</sup>             | P       | R <sup>2</sup>             | P       |
| pH                              | 0.924                | 0.002**   | 0.881                 | 0.002** | 0.289                   | 0.355   | 0.755                      | 0.019*  | 0.399                      | 0.221   |
| TC                              | 0.709                | 0.025*    | -                     | -       | 0.301                   | 0.349   | -                          | -       | -                          | -       |
| TP                              | 0.823                | 0.004**   | 0.725                 | 0.011*  | -                       | -       | 0.405                      | 0.206   | 0.200                      | 0.506   |
| NH <sub>4</sub> <sup>+</sup> -N | 0.765                | 0.015*    | 0.715                 | 0.017*  | 0.241                   | 0.443   | 0.825                      | 0.004** | 0.414                      | 0.219   |
| NO <sub>3</sub> <sup>-</sup> -N | -                    | -         | 0.297                 | 0.343   | 0.349                   | 0.271   | 0.750                      | 0.014*  | 0.309                      | 0.327   |
| AP                              | 0.918                | 0.003**   | 0.303                 | 0.363   | 0.658                   | 0.036*  | 0.577                      | 0.085   | 0.574                      | 0.093   |
| AK                              | 0.974                | <0.001*** | 0.262                 | 0.428   | 0.885                   | 0.004** | 0.590                      | 0.065   | 0.799                      | 0.007** |
| STP                             | -                    | -         | 0.431                 | 0.209   | -                       | -       | -                          | -       | -                          | -       |
| SM                              | -                    | -         | -                     | -       | 0.563                   | 0.071   | -                          | -       | 0.402                      | 0.220   |
| BD                              | -                    | -         | -                     | -       | -                       | -       | 0.361                      | 0.271   | -                          | -       |

TC, total carbon; TP, total phosphorus; NH<sub>4</sub><sup>+</sup>-N, ammonium; NO<sub>3</sub><sup>-</sup>-N, nitrate-nitrogen; AP, available phosphorus; AK, available potassium. STP, soil total porosity; SM, soil moisture; BD, bulk density. \* $P < 0.05$ ; \*\* $P < 0.01$ ; \*\*\* $P < 0.001$ .

**Table S6.** Mantel test results for the correlation between soil microbial community and soil variables in different taxonomy levels.

| Soil Variables | Fungal phylum taxonomy |        | Fungal class taxonomy |         | Fungal OTU taxonomy |         | Bacterial phylum taxonomy |       | Bacterial class taxonomy |       | Bacterial OTU taxonomy |       |
|----------------|------------------------|--------|-----------------------|---------|---------------------|---------|---------------------------|-------|--------------------------|-------|------------------------|-------|
|                | R <sup>2</sup>         | P      | R <sup>2</sup>        | P       | R <sup>2</sup>      | P       | R <sup>2</sup>            | P     | R <sup>2</sup>           | P     | R <sup>2</sup>         | P     |
| pH             | 0.589                  | 0.067  | 0.203                 | 0.483   | 0.884               | 0.006** | 0.310                     | 0.338 | 0.286                    | 0.374 | 0.386                  | 0.238 |
| TC             | 0.767                  | 0.010* | 0.811                 | 0.007** | 0.752               | 0.013*  | -                         | -     | -                        | -     | 0.261                  | 0.401 |

|                                 |       |         |       |         |       |           |       |        |       |         |       |         |
|---------------------------------|-------|---------|-------|---------|-------|-----------|-------|--------|-------|---------|-------|---------|
| TN                              | -     | -       | -     | -       | -     | -         | 0.101 | 0.743  | 0.065 | 0.841   | -     | -       |
| TP                              | -     | -       | -     | -       | 0.925 | <0.001*** | -     | -      | -     | -       | -     | -       |
| SOC                             | 0.749 | 0.017*  | 0.759 | 0.008** |       |           | 0.390 | 0.217  | 0.488 | 0.113   | -     | -       |
| NH <sub>4</sub> <sup>+</sup> -N | -     | -       | -     | -       | 0.886 | 0.005**   | -     | -      | -     | -       | 0.351 | 0.279   |
| NO <sub>3</sub> <sup>-</sup> -N | -     | -       | -     | -       | -     | -         | 0.341 | 0.296  | 0.349 | 0.271   | 0.378 | 0.226   |
| AP                              | 0.701 | 0.036*  | 0.774 | 0.016*  | 0.908 | <0.001*** | 0.576 | 0.070  | 0.659 | 0.047*  | 0.740 | 0.017*  |
| AK                              | 0.881 | 0.004** | 0.883 | 0.002** | 0.975 | <0.001*** | 0.791 | 0.012* | 0.885 | 0.004** | 0.889 | 0.003** |
| STP                             | -     | -       | -     | -       | -     | -         | -     | -      | -     | -       | -     | -       |
| SM                              | 0.451 | 0.160   | 0.479 | 0.131   | -     | -         | 0.558 | 0.077  | 0.566 | 0.098   | 0.412 | 0.213   |
| BD                              | -     | -       | -     | -       | -     | -         | -     | -      | -     | -       | -     | -       |

TC, total carbon; TN, total nitrogen; TP, total phosphorus; SOC, soil organic carbon; NH<sub>4</sub><sup>+</sup>-N, ammonium nitrogen; NO<sub>3</sub><sup>-</sup>-N, nitrate nitrogen; AP, available phosphorus; AK, available potassium. STP, soil total porosity; SM, soil moisture; BD, bulk density. \* $P < 0.05$ ; \*\* $P < 0.01$ ; \*\*\* $P < 0.001$ .
